# Supplementary material for: Burst-and-coast swimmers optimize gait by adapting unique intrinsic cycle
Source: PubMed Central journal article supplement (PMC7809443; doi:10.1038/s42003-020-01521-z), 2021-01-14
Supplement: 42003_2020_1521_MOESM7_ESM.pdf [file 42003_2020_1521_MOESM7_ESM.pdf]

## **Description of Additional Supplementary Files**

File Name: Supplementary Movie 1

Description: (file: Movie\_S1\_U\_0.66BL\_s.avi): Video recording of a fish swimming at 0.66 BL/s (body-lengths per second)

File Name: Supplementary Movie 2

Description: (file: Movie\_S2\_U\_1.15BL\_s.avi), Video recording of a fish swimming at 1.15 BL/s (body-lengths per second)

File Name: Supplementary Movie 3

Description: (file: Movie\_S3\_U\_1.90BL\_s.avi), Video recording of a fish swimming at 1.90 BL/s (body-lengths per second)
